# Supplementary material
Source: PubMed Central journal article supplement (PMC5165115)
Supplement: AEM.02462-16_zam999117589s1.pdf [file AEM.02462-16_zam999117589s1.pdf]

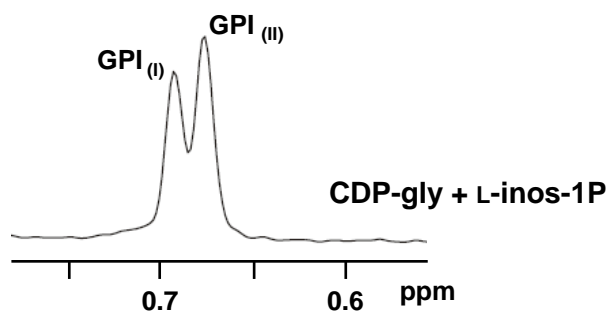

**FIG S1**  $^{31}\text{P}$ -NMR spectrum of glycerophosphoinositol (GPI) derived from the action of DIPP synthase/phosphatase present in cell extracts of *Archaeoglobus fulgidus*. The cell extract was supplied with commercial CDP-glycerol (equal parts of CDP-*sn*-1-glycerol and CDP-*sn*-3-glycerol) and L-*myo*-inositol-1-phosphate (L-ins-1P).  $\text{GPI}_{(I)}$ , resonance due to *sn*-glycero-3-phospho-3-L-*myo*-inositol, the sole stereoisomer of GPI present in *Aquifex* spp.;  $\text{GPI}_{(II)}$ , resonance due to *sn*-glycero-1-phospho-3-L-*myo*-inositol, the predominant stereoisomer of GPI present in *Archaeoglobus fulgidus*.
